# Supplementary material for: Putting AlphaFold models to work with phenix.process_predicted_model and ISOLDE
Source: PubMed Central journal article supplement (PMC9629492; doi:10.1107/s2059798322010026), 2022-10-27
Supplement: d-78-01303-sup1.pdf [file d-78-01303-sup1.pdf]

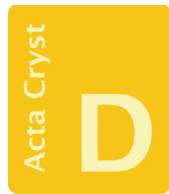

STRUCTURAL  
BIOLOGY

**Volume 78 (2022)**

**Supporting information for article:**

**Putting *AlphaFold* models to work with  
*phenix.process\_predicted\_model* and *ISOLDE***

**Robert D. Oeffner, Tristan I. Croll, Claudia Millán, Billy K. Poon, Christopher J. Schlicksup, Randy J. Read and Tom C. Terwilliger**

**S1. AlphaFold prediction of PDB ID: 7LW7**

In section 8 we remark on some of the low confidence areas of the *AlphaFold* prediction of the UniProt id: Q9H790 corresponding to the PDB ID:7LW7. The *AlphaFold* Protein Structure Database contains structural predictions of the human proteome. In anticipation of future improvements to *AlphaFold* the structures in that database may not remain static over time. The *AlphaFold* prediction of the UniProt id: Q9H790 corresponding to PDB ID:7LW7 and the associated PAE matrix at the time of writing is therefore made available as supplementary material.

**S2. AlphaFold prediction of PDB ID: 6L5L and 6j09**

The *PHENIX* Colab notebook *AlphaFold* predictions of the amino acid sequence corresponding to the structures with PDB ID: 6L5L and 6j09 discussed in section 7 produces coordinate files (.pdb) and associated PAE matrix files (.jsn). All files are available as supplementary material.

**S3. Additional video**

The *ChimeraX ISOLDE* video mentioned in section 7.4 is available as supplementary material.
